# Supplementary material
Source: HighWire-hosted journal article supplement (https://www.cmaj.ca/highwire/filestream/81158/field_highwire_adjunct_files/0/211698-res-1-at.pdf)
Supplement: 211698-res-1-at.pdf [file 211698-res-1-at.pdf]

| Site                                                                                                                                           | Investigators            |
|------------------------------------------------------------------------------------------------------------------------------------------------|--------------------------|
| Centre hospitalier de l'Université de Montréal                                                                                                 | Madeleine Durand         |
|                                                                                                                                                | François Martin Carrier  |
| Centre Intégré Universitaire de Santé et de Services Sociaux du Nord de l'île de Montréal, Hôpital du Sacré Cœur de Montréal (CIUSSS-NÎM-HSCM) | Alexandros Cavayas       |
| CHU de Québec Université Laval<br>Hôpital de l'enfant Jésus                                                                                    | Alexis Turgeon           |
| CIUSSSE-CHUS                                                                                                                                   | Francois Lamontagne      |
| Eastern Regional Health Authority                                                                                                              | Peter Daley              |
| Grand River Hospital                                                                                                                           | Stephen Giilck           |
|                                                                                                                                                | Theresa Liu              |
| Grey Nuns Community Hospital                                                                                                                   | Holly Hoang              |
| Hopital Montfort/Institut du Savoir Montfort                                                                                                   | Nicolas Chagnon          |
|                                                                                                                                                | Sarah Mansour            |
| Humber River Hospital                                                                                                                          | Keren Mandelzweig        |
|                                                                                                                                                | Sanjay Manocha           |
|                                                                                                                                                | Stephanie Go             |
| Institut universitaire de cardiologie et de pneumologie de Québec<br>IUCPQ                                                                     | Francois Lellouche       |
| Island Health (Nanaimo Regional Hospital)                                                                                                      | Daniel Ovakim            |
|                                                                                                                                                | David Forrest            |
|                                                                                                                                                | Alastair Teale           |
| Island Health (Royal Jubilee Hospital)                                                                                                         | Daniel Ovakim            |
| Kingston General Hospital                                                                                                                      | Santiago Perez-Patrigeon |
| Lawson Health Research Institute – University Hospital London                                                                                  | Michael Silverman        |
| Lawson Health Research Institute – Victoria Hospital London                                                                                    | Michael Silverman        |
| Lion's Gate Hospital                                                                                                                           | James Douglas            |
|                                                                                                                                                | Miriam Torchinsky        |
|                                                                                                                                                | Gannon Yu                |
| McGill University Health Centre-Glen Site<br>Royal Victoria Hospital                                                                           | Matthew Cheng            |
|                                                                                                                                                | Cecilia Costiniuk        |
|                                                                                                                                                | Kosar Khwaja             |
|                                                                                                                                                | Marina Klein             |
|                                                                                                                                                | Jesse Papenburg          |
|                                                                                                                                                | Patricia Fontela         |
|                                                                                                                                                | Sapha Barkati            |
|                                                                                                                                                | Nadine Kronfli           |
|                                                                                                                                                | Todd C. Lee              |
|                                                                                                                                                | Ami Grunbaum             |
|                                                                                                                                                | Makeda Semret            |
| Emily McDonald                                                                                                                                 |                          |
| Markham Stouffville Hospital                                                                                                                   | Evridiki Fera            |

|                                                      |                       |
|------------------------------------------------------|-----------------------|
|                                                      | Valerie Sales         |
|                                                      | Jeya Nadarajah        |
|                                                      | Anthony La Delfa      |
| Michael Garron Hospital                              | Christopher Kandel    |
| Misericordia Community Hospital                      | Conar Robinson O'Neil |
|                                                      | Erika Macintyre       |
| Mount Sinai Hospital                                 | Mike Fralick          |
|                                                      | Susan Poutanen        |
|                                                      | Bryan Coburn          |
|                                                      | Kieran Quinn          |
|                                                      | Allison McGeer        |
| Niagara Health System                                | Jennifer Tsang        |
|                                                      | George Farjou         |
|                                                      | Karim Ali             |
| North York General Hospital                          | Anna Geagea           |
| Queensway Carleton Hospital                          | Moira Rushton-Marovac |
| Richmond Hospital (part of Vancouver Coastal Health) | Jennifer Grant        |
| Royal Alexandra Hospital                             | Ameeta Singh          |
| Royal Inland Hospital                                | Caitlyn Marek         |
|                                                      | Elizabeth Parfitt     |
|                                                      | Kaveri Gupta          |
| Royal Victoria Regional Health Centre                | Giulio Diodato        |
| Scarborough Health Network (Birchmount Hospital)     | Susan John            |
|                                                      | Jessica Keen          |
|                                                      | Vishal Joshi          |
| Scarborough Health Network (Centenary Hospital)      | Susan John            |
|                                                      | Jessica Keen          |
|                                                      | Vishal Joshi          |
| Scarborough Health Network (General Hospital)        | Susan John            |
|                                                      | Jessica Keen          |
|                                                      | Vishal Joshi          |
| St. Paul's Hospital (Vancouver)                      | Natasha Press         |
|                                                      | William Connors       |
| St. Joseph's Healthcare Hamilton                     | Erick Duan            |
| St. Joseph's Health Centre (Toronto)                 | Kevin Schwartz        |
|                                                      | Peter Mitoff          |
| St. Michael's Hospital                               | Darrell Tan           |
|                                                      | John Marshall         |
| Sunnybrook Hospital                                  | Rob Fowler            |
|                                                      | Nick Daneman          |
| The Ottawa Hospital – Civic Campus                   | Shane English         |
| The Ottawa Hospital – General Campus                 | Shane English         |
| Thunder Bay Regional Health Sciences Centre          | Greg Gamble           |
| Trillium Health Partners – Credit Valley Site        | Christopher Graham    |
|                                                      | Tiffany Chan          |

|                                                    |                       |
|----------------------------------------------------|-----------------------|
| Trillium Health Partners – Mississauga Site        | Christopher Graham    |
|                                                    | Tiffany Chan          |
| Toronto Western Hospital                           | Bryan Coburn          |
| University of Alberta Hospital                     | Nelson Lee            |
|                                                    | Erika MacIntyre       |
|                                                    | Wendy Sligl           |
| University of Calgary - Foothills                  | Alain Tremblay        |
| University of Calgary - Peter Lougheed             | Alain Tremblay        |
| University of Calgary - Rockyview General Hospital | Alain Tremblay        |
| University of Calgary - South Health Campus        | Alain Tremblay        |
| University of Manitoba – Grace General Hospital    | Yoav Keynan           |
|                                                    | Gloria Vazquez Grande |
|                                                    | Ryan Zarychanski      |
|                                                    | Amila Heendeniya      |
|                                                    | Sylvain Lothier       |
| University of Manitoba – St. Boniface Hospital     | Yoav Keynan           |
|                                                    | Gloria Vazquez Grande |
|                                                    | Ryan Zarychanski      |
|                                                    | Terry Wuerz           |
| Vancouver General Hospital                         | Allison Mah           |
| William Osler Health – Brampton Civic Hospital     | Alexandra Binnie      |
|                                                    | Sergio Borgia         |
| William Osler Health – Etobicoke General Hospital  | Alexandra Binnie      |
|                                                    | Thomas Havey          |

Table S1: Site Investigators

**Other Collaborators:**

Barbara Antuna-Puente, Eneko Arhanchiague, Pascale Arlotto, Zeeshan Aslam, Fiona Auld, Mahin Baqi, David Bellemare, Alexandra Binnie, Isaac Bogoch, Vikas Chaubey, William Connors, Olivier Costerousse, Giulio DiDiodato, Charlene Fell, Greg Gamble, Stephen Gilck, Galo Ginocchio, Stephanie Go, Christopher Graham, Kaveri Gupta, Brent Guy, Amila Heendeniya, Holly Hoang, Susan John, Christopher Kandel, Anthony Ladelfa, Francois Lellouche, Allison Mah, Keren Mandelzweig, Sanjay Manocha, Caitlyn Marek, Rosa Myrna Marticonrena, Stephanie Matte, Marc Messier-Peet, Patrick Mitchell, Elliott Owen, Elizabeth Parfitt, Lisa Patterson, Shaqil Peermohamed, Germain Poirier, Susan Poutanen, Jeff Powis, Natasha Press, Valerie Sales, Maureen Taylor

|                                                                     | Remdesivir<br>(n=634) | Standard of<br>care (n=647) | RR (95% CI)<br>Or<br>Difference in<br>means/medians<br>(95% CI) | Risk Difference (95%<br>CI) | p-value |
|---------------------------------------------------------------------|-----------------------|-----------------------------|-----------------------------------------------------------------|-----------------------------|---------|
| Need for new<br>mechanical<br>ventilation for<br>Survivors, n (%)   | 23 (4.9)              | 49 (10.5)                   | 0.47 (0.29 –<br>0.75)                                           | -5.6% (-9% - -2.2%)         | 0.0013  |
| Need for new<br>mechanical<br>ventilation, Non-<br>Survivors, n (%) | 22 (22.4)             | 39 (31.4)                   | 0.71 (0.45 –<br>1.12)                                           | -9% (-20% - 2.6%)           | 0.14    |
| New hepatic<br>dysfunction,<br>Survivors, n (%)                     | 74 (14.6)             | 67 (13.5)                   | 1.08 (0.8 – 1.47)                                               |                             | 0.60    |
| New hepatic<br>dysfunction, Non-<br>Survivors, n(%)                 | 8 (6.8)               | 21 (14.7)                   | 0.47 (0.21 –<br>1.01)                                           |                             | 0.04    |
| New dialysis,<br>Survivors, n (%)                                   | 5 (0.99)              | 2 (0.41)                    | 2.44 (0.48 –<br>12.52)                                          |                             | 0.27    |
| New dialysis,<br>Non-Survivors, n<br>(%)                            | 11 (9.6)              | 13 (9.1)                    | 1.06 (0.49 –<br>2.280)                                          |                             | 0.87    |

Table S2: Data for key secondary outcomes, presented across survivors and non-survivors.

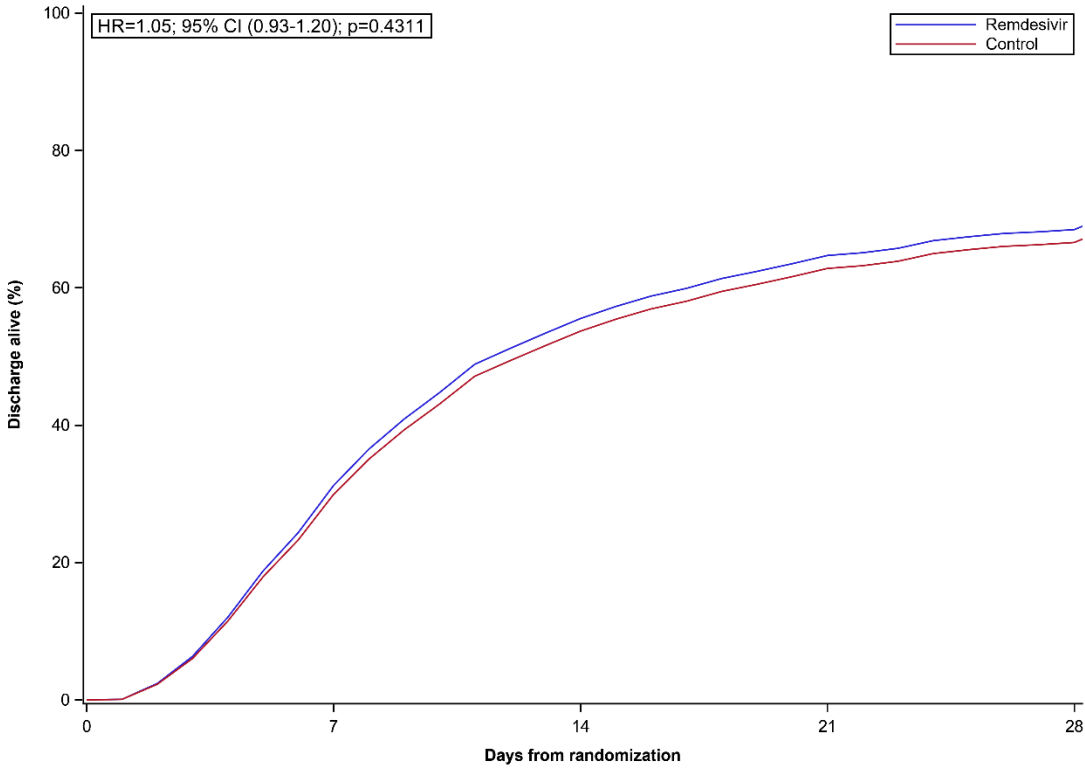

Figure S1: Cumulative Incidence function for days from randomization with competing risk for mortality and censored at 28 days for those still in the hospital.

|                       |                           | CATCO Patients Included in the WHO Solidarity Trial |                          | CATCO Patients Enrolled Separate from (after) the WHO Solidarity Trial |                          |
|-----------------------|---------------------------|-----------------------------------------------------|--------------------------|------------------------------------------------------------------------|--------------------------|
| In-hospital Mortality | Respiratory support day 1 | Remdesivir (n=455)                                  | Standard of care (n=488) | Remdesivir (n=170)                                                     | Standard of Care (n=153) |
|                       | No Oxygen therapy         | 4/57 (7.02%)                                        | 7/44 (15.91%)            | 3/11 (27.27%)                                                          | 1/10 (10%)               |
|                       | Oxygen therapy            | 26/234 (11.11%)                                     | 47/271 (17.34%)          | 10/96 (10.42%)                                                         | 11/89 (12.36%)           |
|                       | HFNC                      | 34/105 (32.38%)                                     | 41/110 (37.27%)          | 11/44 (25%)                                                            | 11/43 (25.58%)           |

|                                                                                                     |                           | CATCO Patients Included in the WHO Solidarity Trial |                          | CATCO Patients Enrolled Separate from (after) the WHO Solidarity Trial |                          |
|-----------------------------------------------------------------------------------------------------|---------------------------|-----------------------------------------------------|--------------------------|------------------------------------------------------------------------|--------------------------|
| In-hospital Mortality                                                                               | Respiratory support day 1 | Remdesivir (n=455)                                  | Standard of care (n=488) | Remdesivir (n=170)                                                     | Standard of Care (n=153) |
|                                                                                                     | Non-invasive              | 7/17 (41.18%)                                       | 4/19 (21.05%)            | 3/5 (60%)                                                              | 2/4 (50%)                |
|                                                                                                     | Invasive                  | 15/42 (35.71%)                                      | 19/45 (42.22%)           | 4/14 (28.57%)                                                          | 2/7 (28.57%)             |
| Need for Invasive Ventilation not ventilated at baseline                                            | Respiratory support day 1 | Remdesivir (n=413)                                  | Standard of care (n=443) | Remdesivir (n=157)                                                     | Standard of Care (n=148) |
|                                                                                                     | No Oxygen therapy         | 1/57 (1.75%)                                        | 3/44 (6.82%)             | 1/12 (8.33%)                                                           | 1/10 (10%)               |
|                                                                                                     | Oxygen therapy            | 11/235 (4.68%)                                      | 29/271 (10.7%)           | 3/96 (3.13%)                                                           | 12/91 (13.19%)           |
|                                                                                                     | HFNC                      | 12/105 (11.43%)                                     | 30/109 (27.52%)          | 13/44 (29.55%)                                                         | 8/43 (18.6%)             |
|                                                                                                     | Non-invasive              | 3/16 (18.75%)                                       | 4/19 (21.05%)            | 2/5 (40%)                                                              | 2/4 (50%)                |
| Composite of need for invasive ventilation or in-hospital death in those not ventilated at baseline | Respiratory support day 1 | Remdesivir (n=412)                                  | Standard of care (n=444) | Remdesivir (n=157)                                                     | Standard of care (n=147) |
|                                                                                                     | No Oxygen therapy         | 5/56 (8.93%)                                        | 9/44 (20.45%)            | 4/12 (33.33%)                                                          | 2/10 (20%)               |
|                                                                                                     | Oxygen therapy            | 31/234 (13.25%)                                     | 66/271 (24.35%)          | 11/96 (11.46%)                                                         | 19/90 (21.11%)           |
|                                                                                                     | HFNC                      | 42/105 (40%)                                        | 53/110 (48.18%)          | 19/44 (43.18%)                                                         | 15/43 (34.88%)           |
|                                                                                                     | Non-invasive              | 7/17 (41.18%)                                       | 8/19 (42.11%)            | 3/5 (60%)                                                              | 2/4 (50%)                |

Table S3: Results for SOLIDARITY and CATCO randomized patients, by baseline level of respiratory support
